# Supplementary material
Source: Elsevier journal article supplement (https://comptes-rendus.academie-sciences.fr/geoscience/article/10.1016/j.crte.2016.02.002/file/attach/mmc1.pdf)

SM 1. Main stratigraphic microfossils from Borehole CDB1 – palynological material. 1. *Aglaoreidia cyclops* (Ruppiaceae). 2. *Tricolporopollenites duvignaudi* (Rubiaceae?). 3. *Diporites* sp. (Burmaniaceae). 4. *Pompeckjoidaepollenites subhercynicus* (Myricaceae). 5. *Tricolporopollenites rhombus* (Apiaceae:Hoheanackeria). 6. *Tricoporopollenites ludensis* (Apiaceae: Bupleurum). 7. *Cicatricosisporites paradorogensis* (Schizeaceae). 8–9. *Tricolporopollenites raghunensis* (unknown family). 10–11. *Boehlensipollis hohli* (Eleagnaceae). 12. *Margocolporites vanwijhei* (Caesalpiniaceae). 13. *Cicatricosisporites paradorogensis* (Schizeaceae). 14. *Lygodium* (Schizeaceae). 15. *Psilatricolporites crassus* (Theaceae). 16. *Retitricolporites dipterocarpaceoides* (Nympheaceae). 17. *Porocolpopollenites vestibulum* (Symplocaceae). 18. *Podocarpidites* (Podocarpaceae). 19. *Apteodinium australiense* (Dinoflagellate cyst). 20. *Vozzhennikovia cearaichia* (Dinoflagellate cyst).

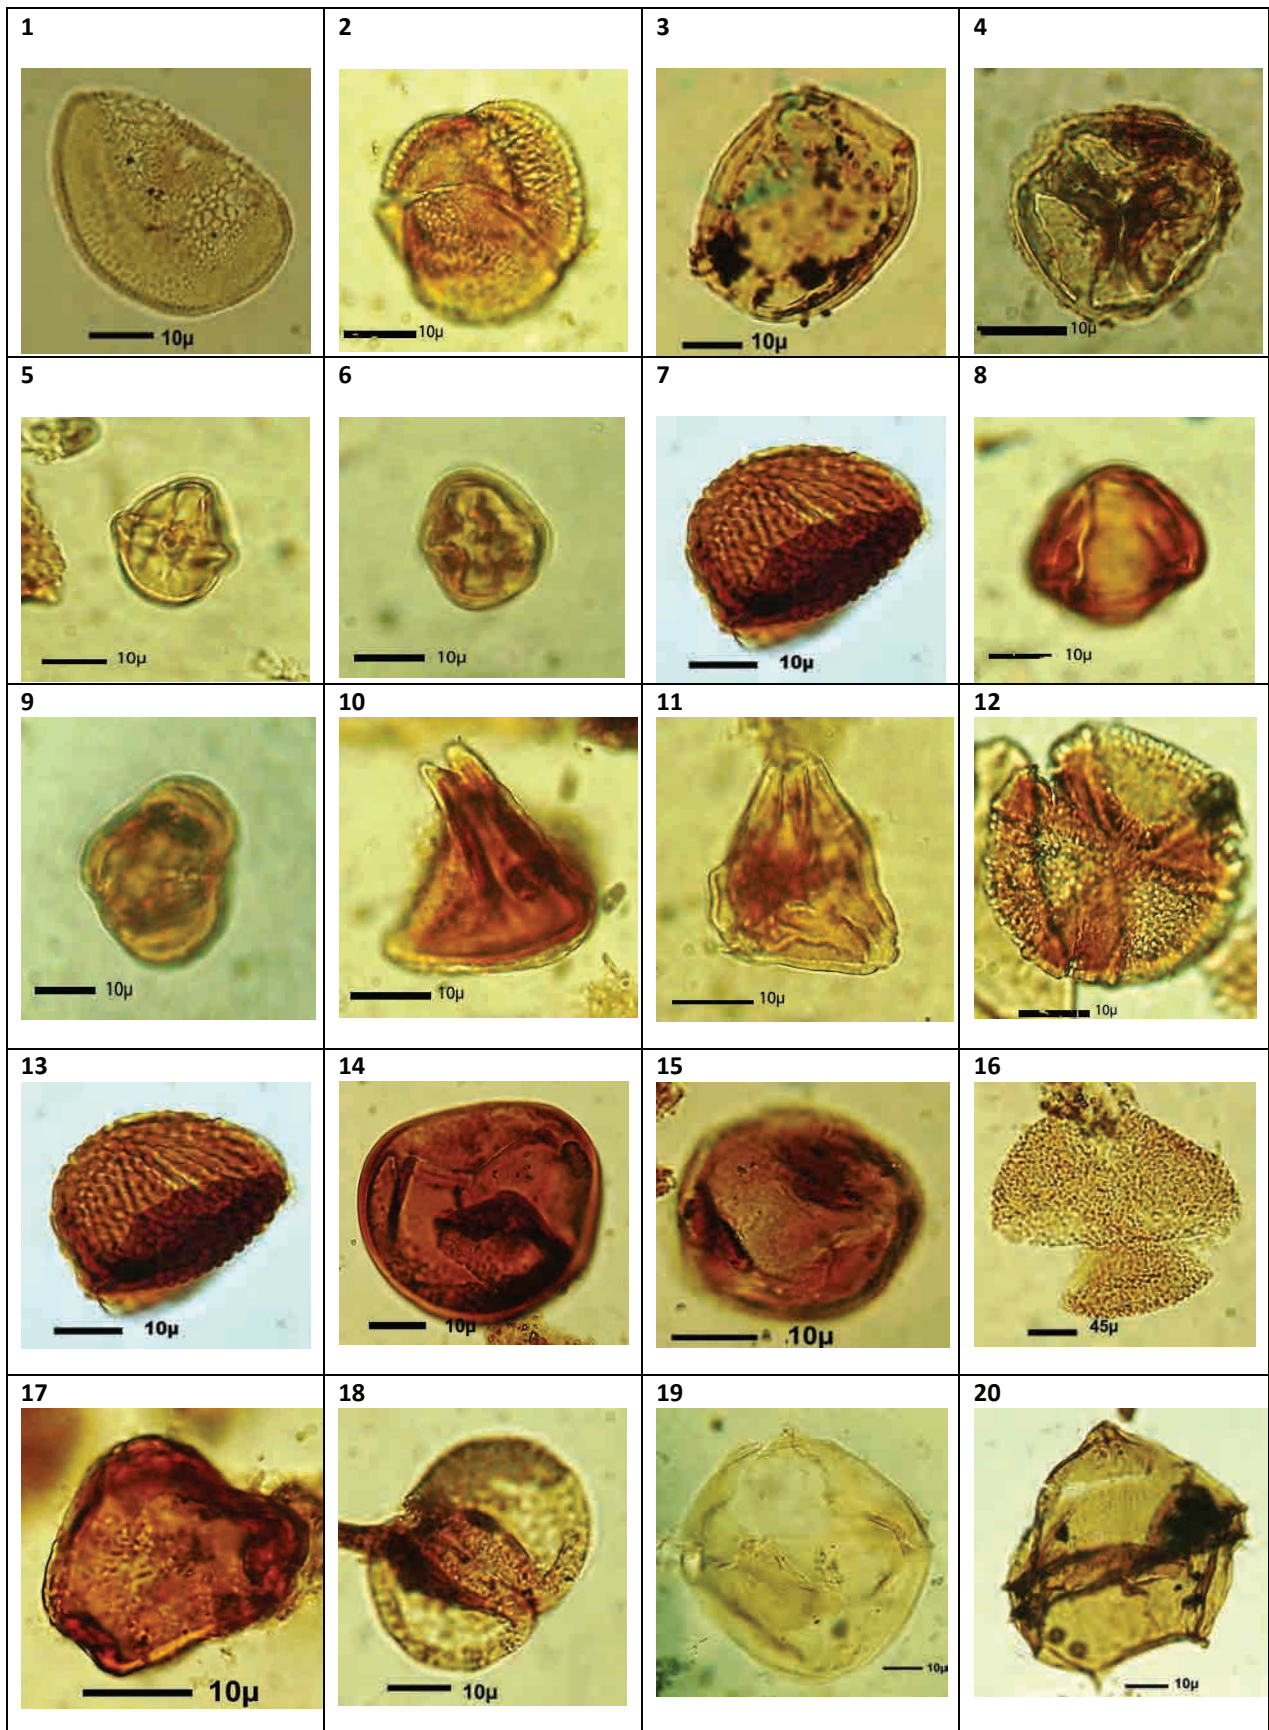

Supplement: mmc1 [file mmc1.pdf]
